# Supplementary material for: Inhibition of Rat 5α-Reductase Activity and Testosterone-Induced Sebum Synthesis in Hamster Sebocytes by an Extract of Quercus acutissima Cortex
Source: PubMed Central journal article supplement (PMC4325551; doi:10.1155/2015/853846), 2015-01-29
Supplement: 853846.f1.pdf [file 853846.f1.pdf]

## Supplementary data

Four Figures and Two Tables

### **Fig. S1. No cytotoxic effect of BK and pentagalloyl glucose in hamster primary sebocytes**

Hamster-derived sebaceous gland cells (Ha-SE) were precultured until confluent in the presence of 10 ng/mL epidermal growth factor (EGF), and further cultured with 10, 30  $\mu\text{g/mL}$  *bokusoku* (BK), 10, 30  $\mu\text{mol/L}$  pentagalloyl glucose, 0.2% triton X-100, or vehicle in the presence of EGF. Twenty four hours later, cell cytotoxicity was measured using a XTT reagent. N=3

### **Fig. S2. Bioconversion of exogenous dihydrotestosterone to 5 $\alpha$ -androstane-3,17-diol by rat liver microsomal enzymes**

Dihydrotestosterone (DHT) was incubated at a final concentration of 3.5  $\mu\text{mol/L}$  for 30 min in the presence or absence of rat liver microsomes (40  $\mu\text{g/mL}$ ) and the co-factors. The metabolites were extracted with ethyl acetate after incubation, and analyzed by TLC. All androgen standards were applied at 0.1  $\mu\text{g}/\mu\text{L}/\text{spot}$ . T.: testosterone, DHT: dihydrotestosterone, A.diol: 5 $\alpha$ -androstane-3 $\alpha$ ,17 $\beta$ -diol

**Fig. S3. Chemical structure of 1,2,3,4,6-penta-O-galloyl glucose (pentagalloyl glucose)**

**Fig. S4. Reduction of generation of reactive oxygen species by BK**

Chemiluminescent assay for determining xanthine oxidase activity was performed using a superoxide probe of 2-methyl-6-p-methoxyphenylethynylimidazopyrazinone (MPEC; ATTO Co., Tokyo, Japan). In brief, *bokusoku* (BK) or ascorbic acid was added at the indicated concentrations to the reaction containing hypoxanthine, xanthinoxidase from buttermilk (Oriental Yeast Co., Tokyo, Japan), MPEC. Superoxide generated in the reaction for 1 min was evaluated by measuring chemiluminescent intensity. N=3,

**Supplementary Table S1. Methods of LC-MS/MS: Ion parameters of test compounds**

| Compound name                | Q1Mass<br>( <i>m/z</i> ) | Q3Mass<br>( <i>m/z</i> ) | DP<br>(volts) | CE<br>(volts) | CXP<br>(volts) | #   |
|------------------------------|--------------------------|--------------------------|---------------|---------------|----------------|-----|
| tetragalloyl glucose         | 787.213                  | 168.9                    | -155          | -70           | -13            | 1-1 |
| pentagalloyl glucose         | 939.262                  | 769.1                    | -165          | -44           | -21            | 1-1 |
| hamamelitannin               | 483.18                   | 168.8                    | -105          | -42           | -11            | 1-1 |
| eugenin                      | 937.241                  | 301                      | -175          | -64           | -17            | 1-1 |
| 1-desgalloyl eugenin         | 785.268                  | 300.7                    | -175          | -56           | -19            | 1-1 |
| (-)-epicatechin gallate      | 441.043                  | 168.9                    | -80           | -28           | -13            | 1-2 |
| (-)-epigallocatechin gallate | 457.151                  | 124.8                    | -95           | -54           | -19            | 1-2 |
| (+)-catechin                 | 288.917                  | 109.1                    | -90           | -32           | -17            | 1-2 |
| (±)-gallocatechin            | 305.057                  | 125.1                    | -95           | -30           | -19            | 1-2 |
| chrysin                      | 252.93                   | 142.8                    | -80           | -38           | -9             | 1-2 |
| luteolin                     | 284.85                   | 132.3                    | -90           | -68           | -23            | 1-2 |
| quercetin                    | 300.98                   | 150.7                    | -105          | -30           | -9             | 1-2 |
| quercitrin                   | 447.103                  | 300.5                    | -110          | -36           | -17            | 1-2 |
| genistein                    | 268.919                  | 132.7                    | -105          | -42           | -21            | 1-2 |
| gallic acid                  | 168.79                   | 125                      | -65           | -22           | -19            | 1-3 |
| methyl gallate               | 182.851                  | 123.9                    | -65           | -30           | -19            | 1-3 |
| casuarinin                   | 937.096                  | 345.1                    | 181           | 39            | 24             | 2-4 |
| castalagin                   | 935.025                  | 468.9                    | 181           | 39            | 22             | 2-4 |
| stenophyllanin C             | 1057.252                 | 585.2                    | 216           | 43            | 10             | 2-4 |
| fraxin                       | 371.07                   | 209.1                    | 31            | 19            | 12             | 2-4 |
| (+)-taxifolin                | 305.071                  | 149.1                    | 71            | 31            | 8              | 2-4 |

Limits of quantification were 40 ng/mL for tetragalloyl glucose and 1-desgalloyl eugenin; 3200 ng/mL for pentagalloyl glucose; 4 ng/mL for hamamelitannin and methyl gallate; 1600 ng/mL for eugenin; 10 ng/mL for (-)-epicatechin gallate, chrysin, luteolin, quercetin, quercitrin, fraxin, and (+)-taxifolin; 100 ng/mL for (-)-epigallocatechin gallate, (+)-catechin, (±)-gallocatechin, casuarinin, and castalagin; 2 ng/mL for genistein; 200 ng/mL for gallic acid and stenophyllanin C.

#: LC-MS/MS system and HPLC method ID described in supplementary Table S2.

DP: declustering potential

CE: collision energy

CXP: collision cell exit potential

## Supplementary Table S2. LC-MS/MS Methods:HPLC Conditions

| LC-MS/MS | HPLC   | HPLC conditions                                                                                                                                                                                                                                                                                                                                                                                                                                                                                                                |
|----------|--------|--------------------------------------------------------------------------------------------------------------------------------------------------------------------------------------------------------------------------------------------------------------------------------------------------------------------------------------------------------------------------------------------------------------------------------------------------------------------------------------------------------------------------------|
| System   | method |                                                                                                                                                                                                                                                                                                                                                                                                                                                                                                                                |
| 1        | 1      | <p><b>Column:</b> Ascentis Express RP-amide column (100 × 2.1 mm ID, 2.7-<math>\mu</math>m particle size; Supelco Analytical, Inc., Tokyo, Japan)</p> <p><b>Mobile phase:</b> (A) 0.2 vol % acetic acid, (B) acetonitrile containing 0.2 vol % acetic acid</p> <p><b>Gradient elution program (% B in A):</b> 0-8 min, 22%; 8-8.01 min, 22-90%; 8.01-13 min, 90%; 13-13.01 min, 90-22%; 13.01-18 min, 22%</p> <p>Other conditions: flow rate, 0.2 mL/min; column temperature, 40°C; injection volume, 10 <math>\mu</math>L</p> |
|          | 2      | <p><b>Column:</b> Ascentis Express RP-amide column</p> <p><b>Mobile phase:</b> (A) 0.2 vol % acetic acid, (B) acetonitrile containing 0.2 vol % acetic acid</p> <p><b>Gradient elution program (% B in A):</b> 0-5 min, 22%; 5-10 min, 22-90%; 10-15 min, 90%; 15-15.1 min, 90-22%; 15.1-25 min, 22%</p> <p>Other conditions: flow rate, 0.2 mL/min; column temperature, 40°C; injection volume, 10 <math>\mu</math>L</p>                                                                                                      |
|          | 3      | <p><b>Column:</b> Ascentis Express RP-amide column</p> <p><b>Mobile phase:</b> (A) 0.2 vol % acetic acid, (B) acetonitrile containing 0.2 vol % acetic acid</p> <p><b>Gradient elution program (% B in A):</b> 0-2 min, 22%; 2-10 min, 22-80%; 10-15 min, 80%; 15-15.1 min, 80-22%; 15.1-20 min, 22%</p> <p>Other conditions: flow rate, 0.2 mL/min; column temperature, 40°C; injection volume, 10 <math>\mu</math>L</p>                                                                                                      |
| 2        | 4      | <p><b>Column:</b> Ascentis Express RP-amide column</p> <p><b>Mobile phase:</b> (A) 0.2 vol % formic acid, (B) acetonitrile</p> <p><b>Gradient elution program (% B in A):</b> 0-1 min, 10%; 1-8 min, 10-30%; 8-10 min, 30-90%, 10-12 min, 90%; 12-12.01 min, 90-10 %; 12.01-17 min, 10%</p> <p>Other conditions: flow rate, 0.3 mL/min; column temperature, 40°C; injection volume, 10 <math>\mu</math>L</p>                                                                                                                   |

LC-MS/MS system: system 1, an API4000 triple quadrupole mass spectrometer (AB SCIEX, Tokyo, Japan) equipped with an Agilent 1100 system (Agilent Technologies, Inc., Tokyo, Japan); system 2, a TripleQuad6500® (AB SCIEX) equipped with an Agilent 1290 system (Agilent Technologies, Inc.)

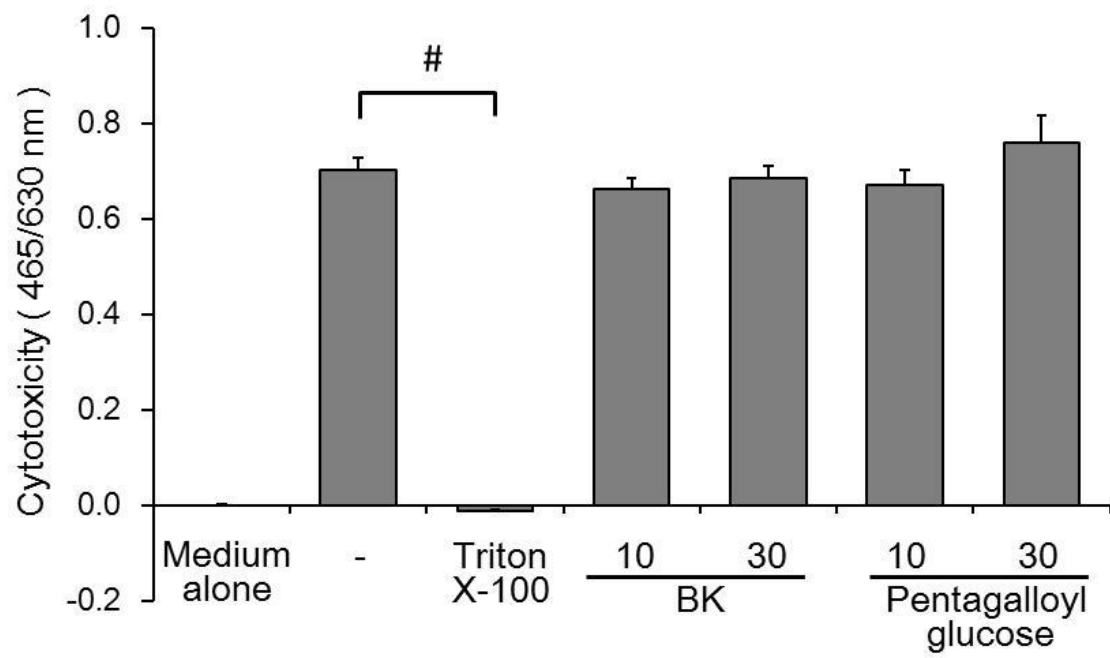

Fig. S1

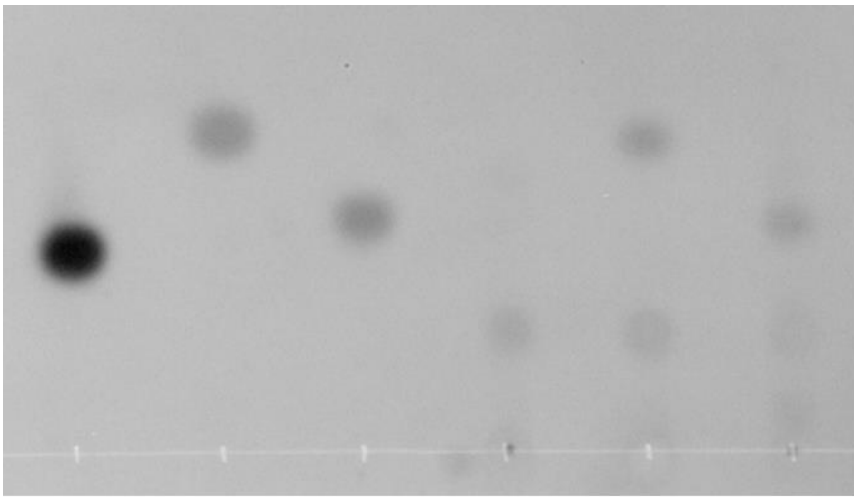

|          |     |         |   |     |     |                 |
|----------|-----|---------|---|-----|-----|-----------------|
| T.       | DHT | A. diol | - | DHT | DHT | Androgen        |
| Standard |     |         | + | -   | +   | Liver microsome |

Fig. S2

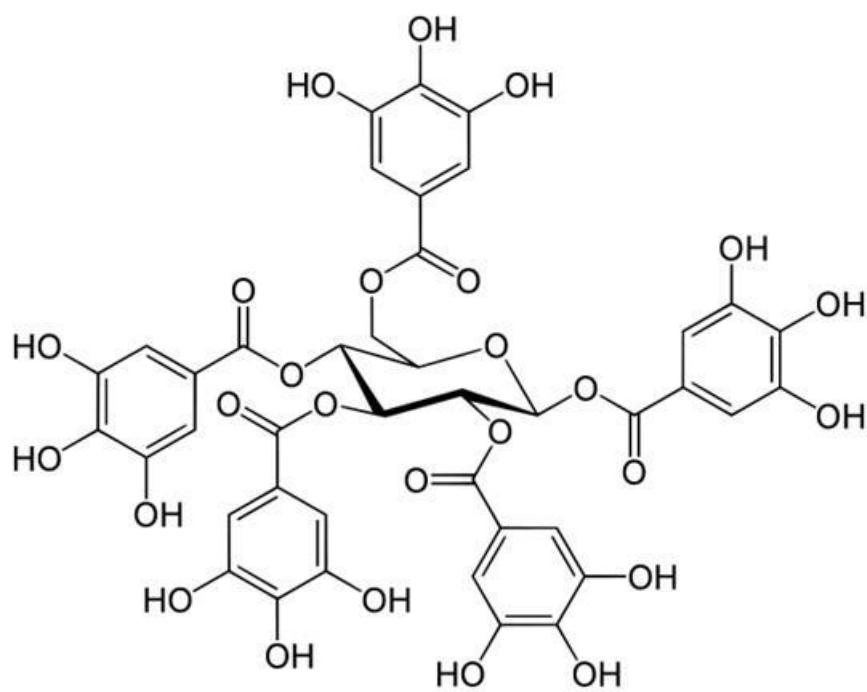

Fig. S3

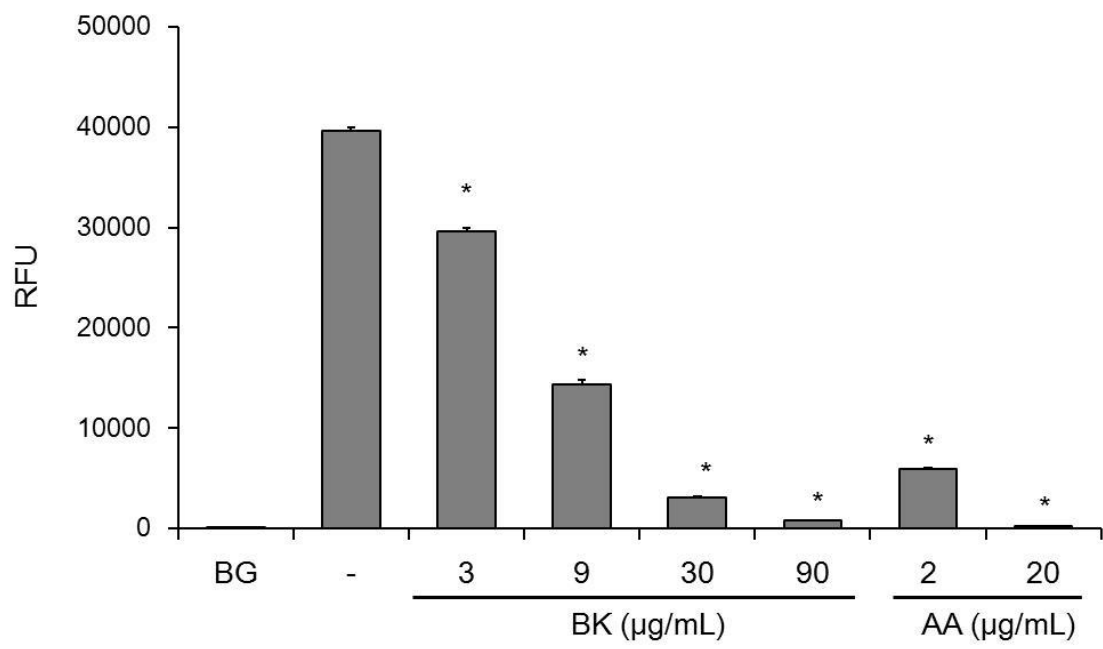

Fig. S4
